# Supplementary material for: Development and validation of a prognostic model to predict birth weight: individual participant data meta-analysis
Source: PubMed Central journal article supplement — BMJ Med. 2024 Aug 14;3(1):e000784. doi: 10.1136/bmjmed-2023-000784 (PMC11344865; doi:10.1136/bmjmed-2023-000784), 2024-08-14
Supplement: bmjmed-3-1-s003.pdf [file bmjmed-3-1-s003.pdf]

### Appendix 3 Best fitting fractional polynomial transformations for continuous predictors

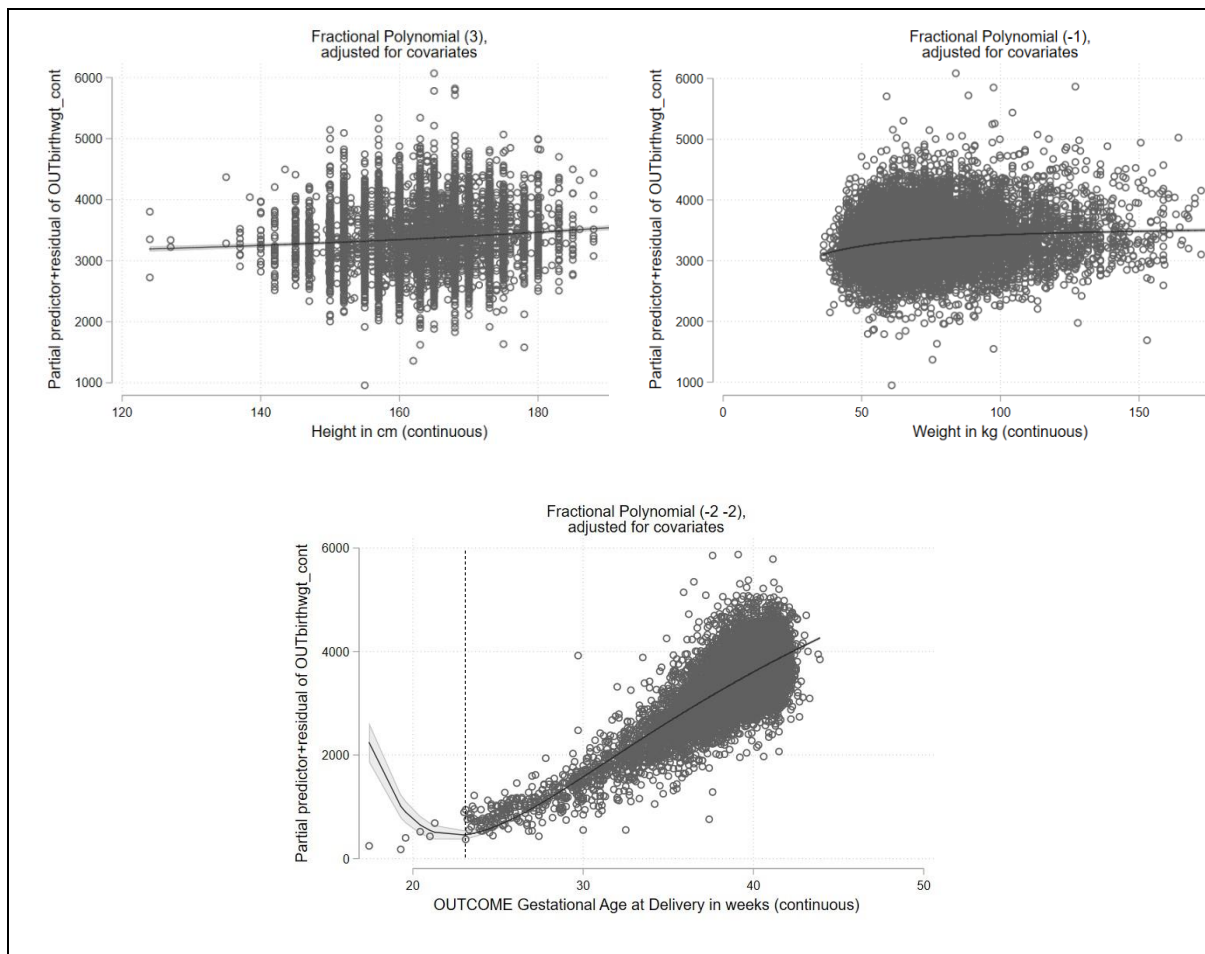

The number in brackets shows the best fitting transformation, where (3) is FP1 with a power of  $x^3$ , (-1) is FP1 with the reciprocal (power  $x^{-1}$ ), and (-2 -2) is FP2 with the powers of  $x^{-2}$  and  $x^{-2} \ln x$

\*Given the shape of selected FP2 transformation, predictions will not be clinically relevant when based on assumed gestational ages below 23 weeks (dotted line).
