# Supplementary material for: Development and validation of a prognostic model to predict birth weight: individual participant data meta-analysis
Source: PubMed Central journal article supplement — BMJ Med. 2024 Aug 14;3(1):e000784. doi: 10.1136/bmjmed-2023-000784 (PMC11344865; doi:10.1136/bmjmed-2023-000784), 2024-08-14
Supplement: bmjmed-3-1-s004.pdf [file bmjmed-3-1-s004.pdf]

**Appendix 4** Sensitivity analysis of pooled apparent calibration of the IPPIC birthweight model by gestational age at delivery

| Gestational age at delivery | Number of cohorts in meta-analysis | Number of women across cohorts | Performance measure      | Pooled estimate | Confidence interval | Prediction interval | Tau <sup>2</sup> |
|-----------------------------|------------------------------------|--------------------------------|--------------------------|-----------------|---------------------|---------------------|------------------|
| Any                         | 4                                  | 237,228                        | Calibration slope        | 0.99            | 0.88 to 1.10        | 0.70 to 1.28        | 0.00             |
|                             |                                    |                                | Calibration-in-the-large | 44.45g          | -18.44 to 107.33    | -136.62 to 225.51   | 1400             |
| 32-36 weeks                 | 4                                  | 24,985                         | Calibration slope        | 1.10            | 0.91 to 1.30        | 0.71 to 1.49        | 0.0045           |
|                             |                                    |                                | Calibration-in-the-large | -5.16g          | -127.40 to 119.65   | -281.40 to 271.08   | 2600             |
| ≥37 weeks                   | 4                                  | 205,579                        | Calibration slope        | 0.89            | 0.79 to 0.98        | 0.65 to 1.13        | 0.0022           |
|                             |                                    |                                | Calibration-in-the-large | 46.77g          | -13.01 to 106.54    | -82.82 to 176.35    | 554              |
