# Supplementary material for: Development and validation of a prognostic model to predict birth weight: individual participant data meta-analysis
Source: PubMed Central journal article supplement — BMJ Med. 2024 Aug 14;3(1):e000784. doi: 10.1136/bmjmed-2023-000784 (PMC11344865; doi:10.1136/bmjmed-2023-000784), 2024-08-14
Supplement: bmjmed-3-1-s005.pdf [file bmjmed-3-1-s005.pdf]

**Appendix 5** Absolute error distributions over gestational age at delivery

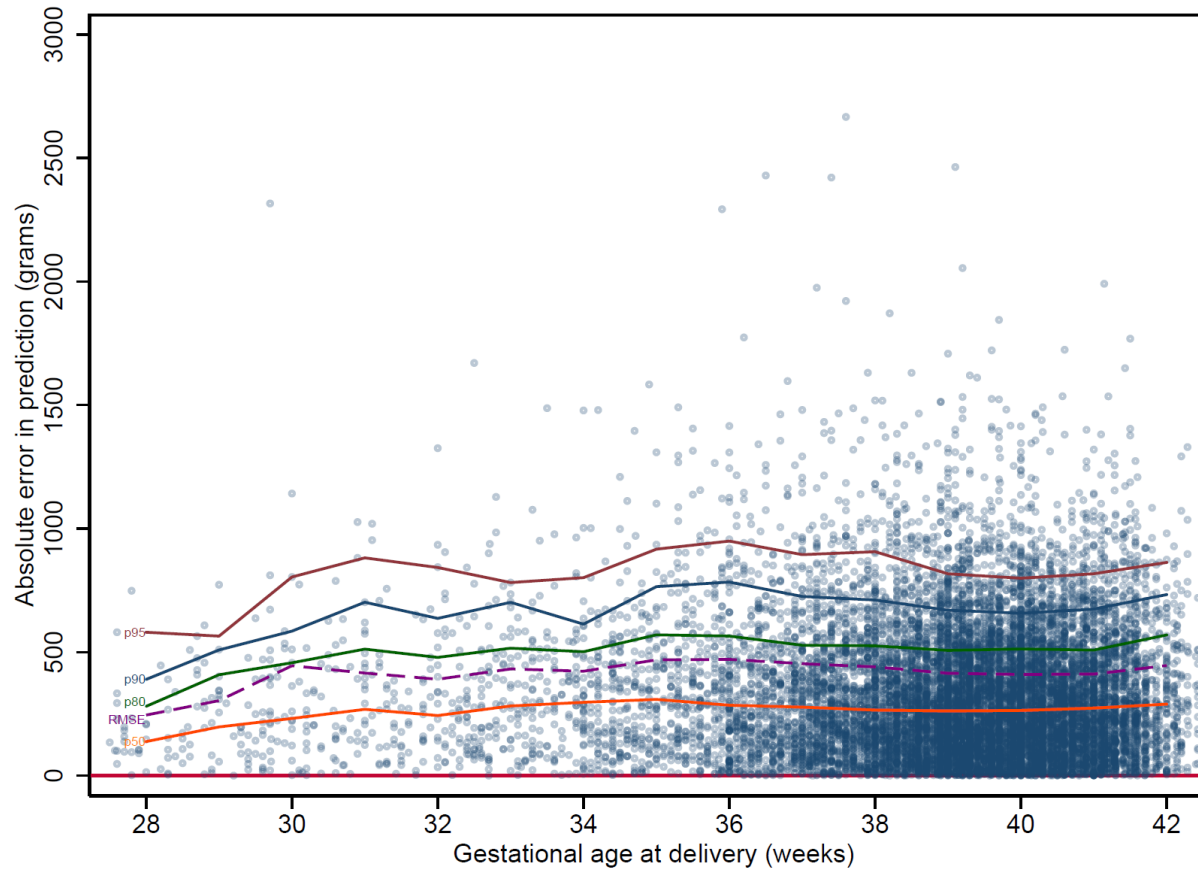

Lines show the 50<sup>th</sup> (orange), 80<sup>th</sup> (green), 90<sup>th</sup> (blue), and 95<sup>th</sup> (red) percentiles across different observed gestational ages at delivery. The dashed line shows the Root Mean Squared Error (RMSE) across different observed gestational ages at delivery.
